# Supplementary material for: A continued role of Short-Lived Climate Forcers under the Shared SocioeconomicPathways
Source: Copernicus journal article supplement (doi:10.5194/esd-2020-9), 2020-03-16
Supplement: Supplementary file 1 [file esd-2020-9-supplement.pdf]

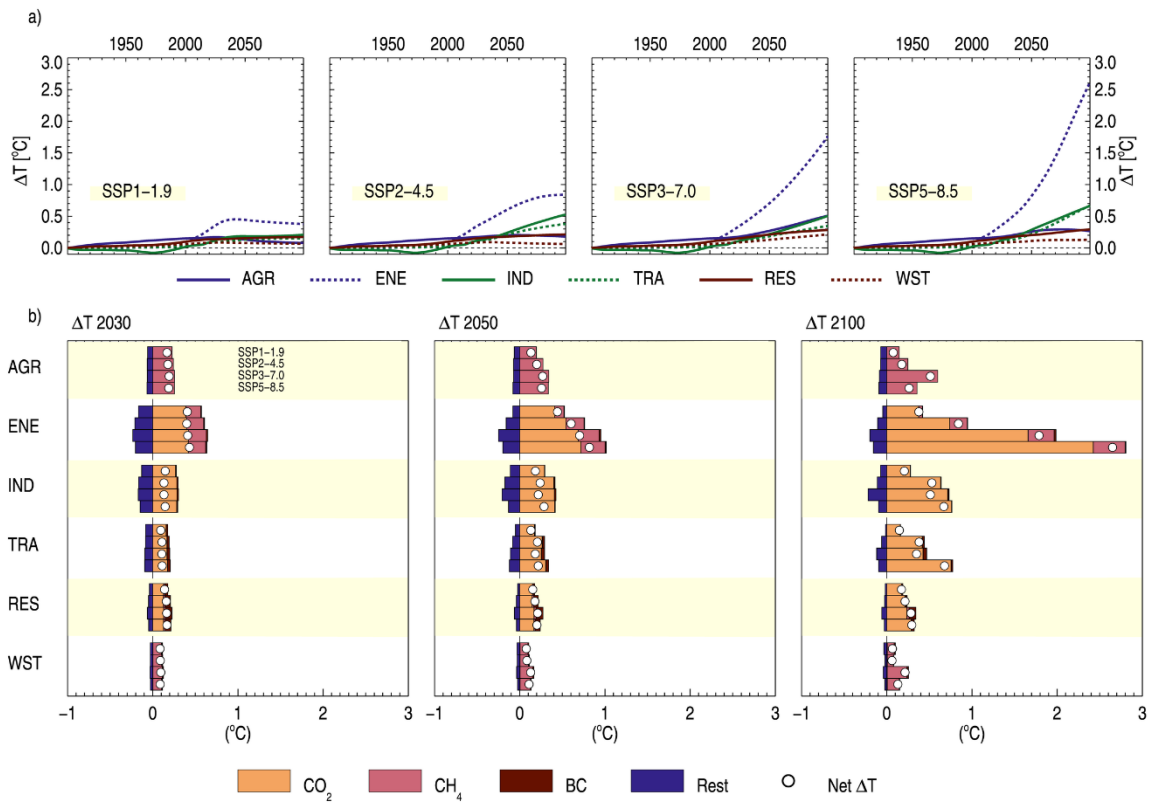

Figure S1: Global mean temperature response to historical emissions and future SSP pathways: a) Net (i.e., sum over all species and regions) response over the period 1900 to 2100 for each sector and scenario and b) net response in 2030, 2050 and 2100 to emissions in six of our seven sectors (excluding shipping, which remains much smaller than the rest), broken down by contributions from  $\text{CO}_2$ , BC, methane and the sum of  $\text{SO}_2$ , OC,  $\text{NH}_3$  and ozone precursors (“Rest”).

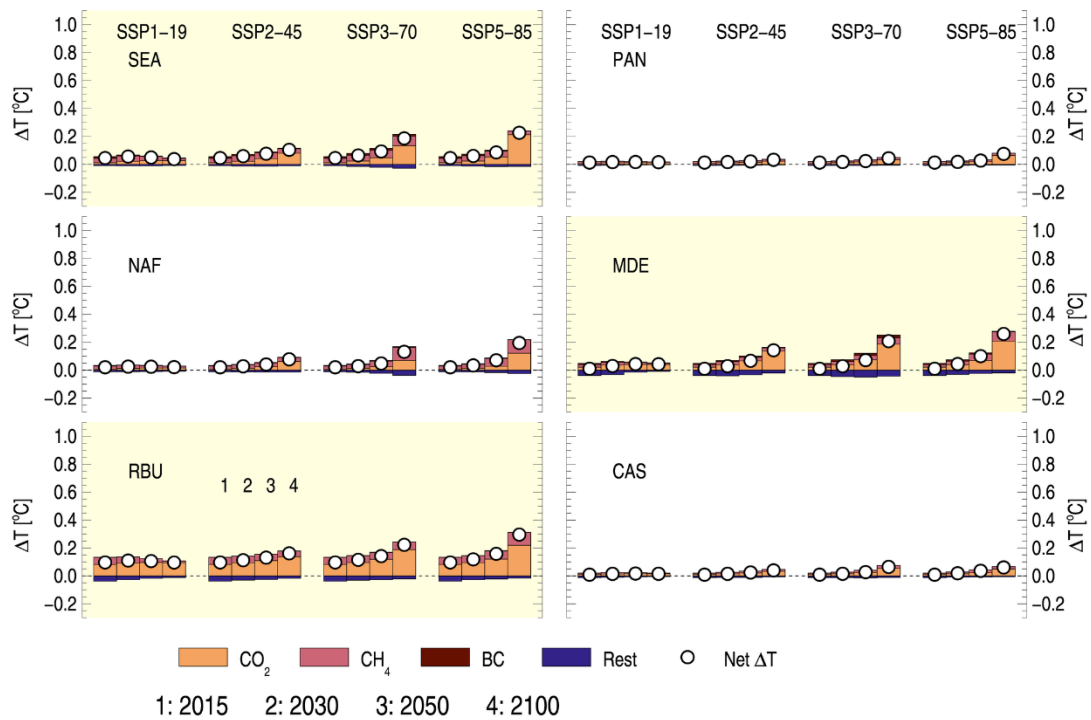

Figure S2: Global mean temperature response to historical emissions and future SSP pathways: Net response in 2015, 2030, 2050 and 2100 to emissions in six regions broken down by contributions from  $CO_2$ , BC, methane and the sum of  $SO_2$ , OC,  $NH_3$  and ozone precursors (i.e., “Rest”).
